# Supplementary material for: Influence of Thermal Annealing on Sinterability of Different Grades Polylactide Microspheres Dedicated for Laser Sintering
Source: Preprints.org preprint supplement (doi:10.20944/preprints202103.0508.v1), 2021-03-22
Supplement: Supplementary file 3 [file supplementary]

**Supplementary materials**

**Figure S1.** The TGA curves of PLA (A) and PLLA (B) microspheres annealed at 40°, 70°, 90° and 120°C.

|  |  |
| --- | --- |

**Figure S2.** The cooling curves of PLA (A) and PLLA (B) microspheres annealed at 40°, 70°, 90° and 120°C.

**Figure S3.** The first heating DSC curve of PLA_90 combined with the 1st and 2nd derivatives of the heat flow.

**Figure S4.** The melting endotherms of indium beads placed on neat PLA and PLLA. The neat PLA and PLLA was performed by melting in DSC pan.

**Figure S5.** Deconvolution of diffraction curves of tested samples.
